# Supplementary material for: Enhanced Photoelectrochemical Water Oxidation on BiVO4 Photoanodes Functionalized by Bimetallic Dicyanamide Molecular Catalysts
Source: MDPI journal article supplement (doi:10.3390/su15043129), 2023-02-08
Supplement: s1 [file s1]

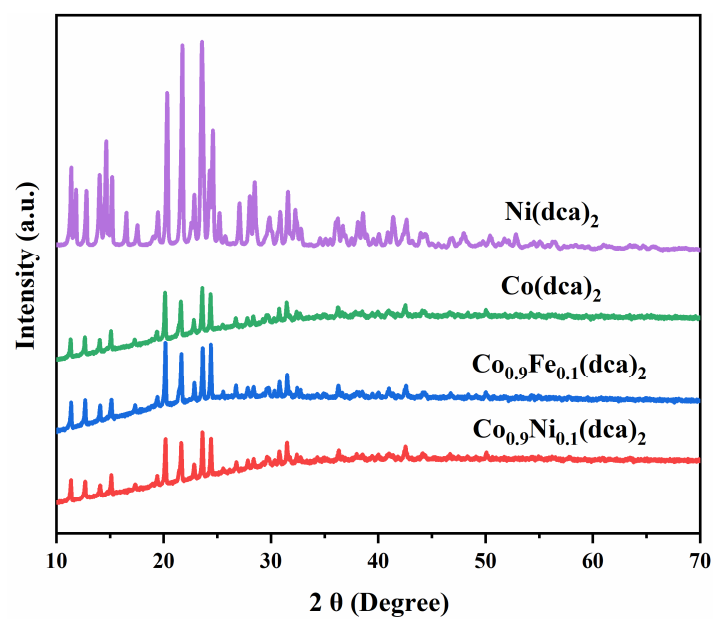

**Figure S1.** XRD patterns of the as-prepared metal dicyanamides.

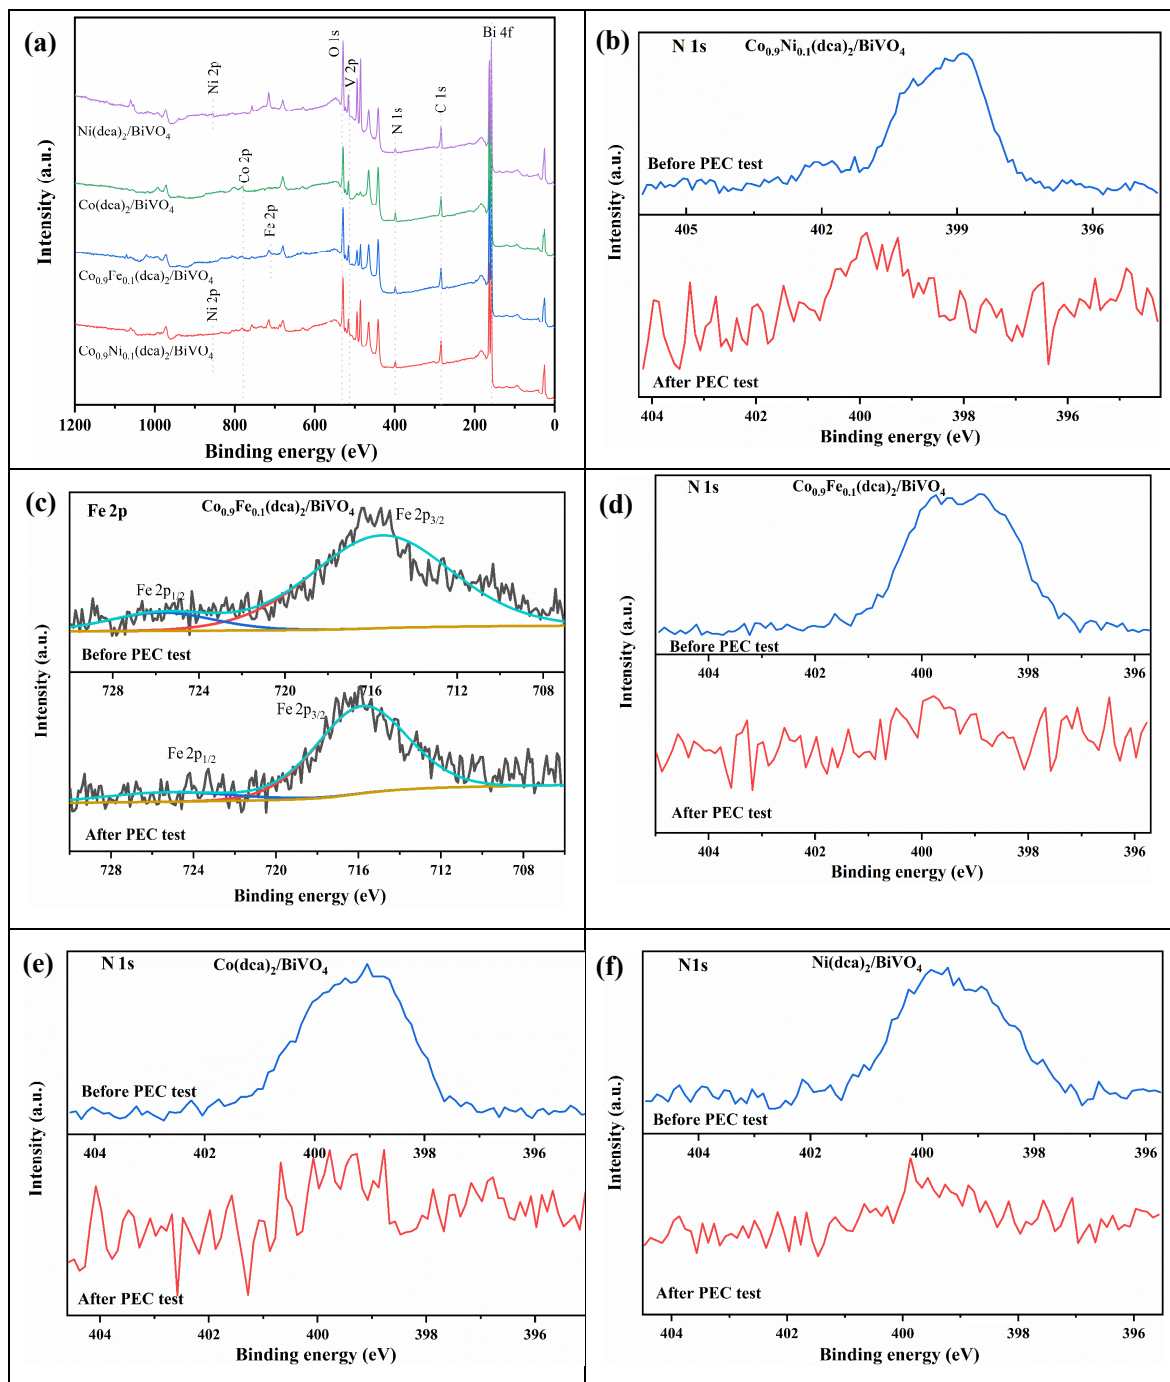

**Figure S2.** (a) XPS survey spectra of  $M(dca)_2/BiVO_4$  photoanodes, (b) XPS N 1s spectra of  $Co_{0.9}Ni_{0.1}(dca)_2/BiVO_4$ , (c) XPS Fe 2p spectra of  $Co_{0.9}Fe_{0.1}(dca)_2/BiVO_4$ , (d) XPS N 1s spectra of  $Co_{0.9}Fe_{0.1}(dca)_2/BiVO_4$ , (e) XPS N 1s spectra of  $Co(dca)_2/BiVO_4$ , (f) XPS N 1s spectra of  $Ni(dca)_2/BiVO_4$  before and after PEC tests.

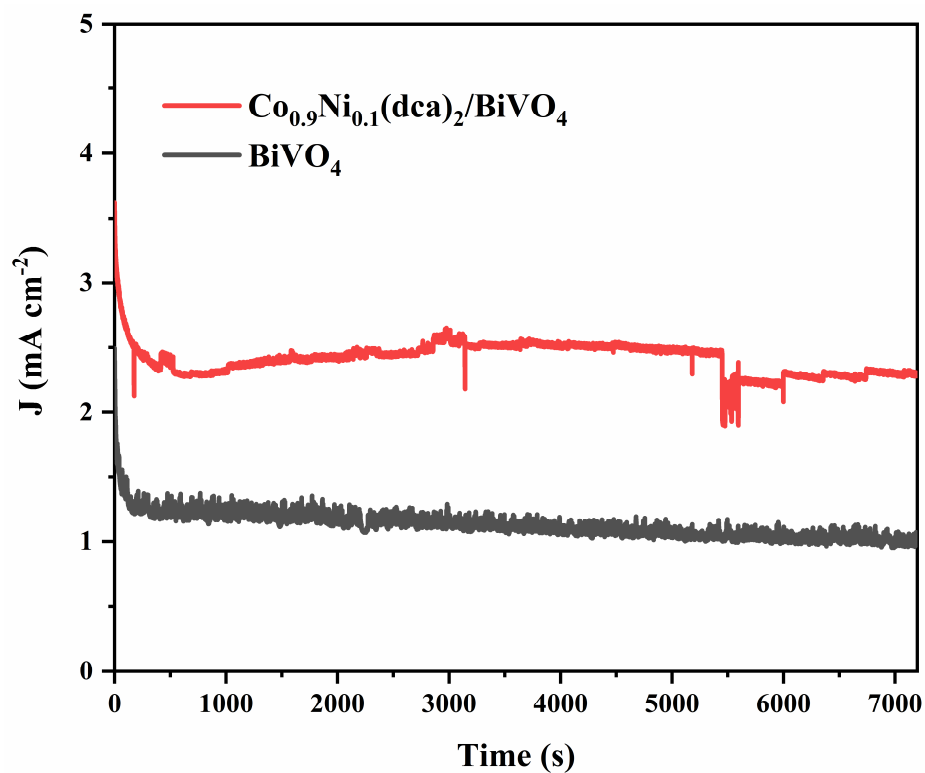

**Figure S3.** Stability I-t curves of  $\text{Co}_{0.9}\text{Ni}_{0.1}(\text{dca})_2/\text{BiVO}_4$  and bare  $\text{BiVO}_4$  photoanodes measured at 1.23 V vs. RHE in 0.5 M  $\text{Na}_2\text{SO}_4$  aqueous solution under AM 1.5G illumination.

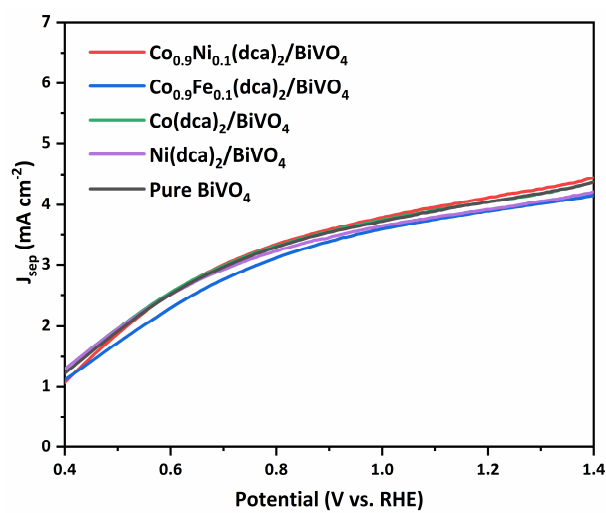

**Figure S4.** Photocurrent densities for  $\text{BiVO}_4$  and  $\text{M}(\text{dca})_2/\text{BiVO}_4$  photoanodes in 0.1 M  $\text{Na}_2\text{SO}_3$  aqueous solution under AM 1.5G illumination.

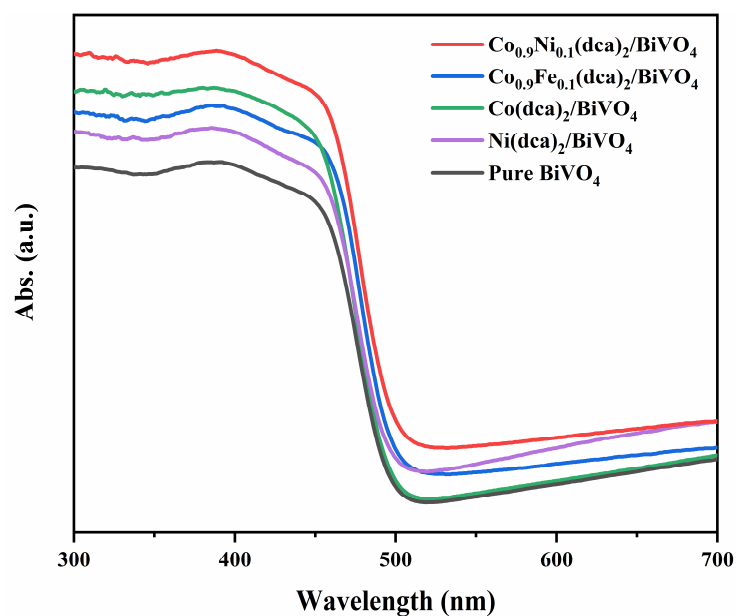

**Figure S5.** UV-Vis spectra of BiVO<sub>4</sub> and M(dca)<sub>2</sub>/BiVO<sub>4</sub> photoanodes.

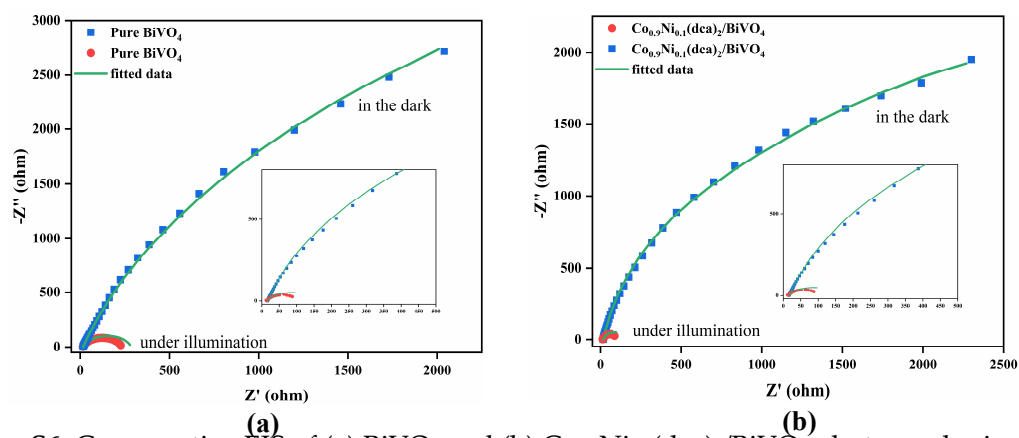

**Figure S6.** Comparative EIS of (a) BiVO<sub>4</sub> and (b) Co<sub>0.9</sub>Ni<sub>0.1</sub>(dca)<sub>2</sub>/BiVO<sub>4</sub> photoanodes in the dark and under illumination.

**Table S1.** EIS-fitted values and flat-band potentials of BiVO<sub>4</sub> and M(dca)<sub>2</sub>/BiVO<sub>4</sub> photoanodes in the equivalent circuit for PEC water oxidation.

|                                  | Co <sub>0.9</sub> Ni <sub>0.1</sub> (dca) <sub>2</sub> /BiVO <sub>4</sub> | Co <sub>0.9</sub> Fe <sub>0.1</sub> (dca) <sub>2</sub> /BiVO <sub>4</sub> | Co(dca) <sub>2</sub> /BiVO <sub>4</sub> | Ni(dca) <sub>2</sub> /BiVO <sub>4</sub> | BiVO <sub>4</sub>     |
|----------------------------------|---------------------------------------------------------------------------|---------------------------------------------------------------------------|-----------------------------------------|-----------------------------------------|-----------------------|
| Flat band potential (mV vs. RHE) | 5.16                                                                      | 18.8                                                                      | 39.8                                    | 42.5                                    | 46.9                  |
| R <sub>CT</sub> (Ω)              | 96.02                                                                     | 135.7                                                                     | 180.2                                   | 216.6                                   | 269.2                 |
| R <sub>SC</sub> (Ω)              | 14.29                                                                     | 17.55                                                                     | 19.98                                   | 16.35                                   | 21.4                  |
| R <sub>S</sub> (Ω)               | 21.55                                                                     | 21.86                                                                     | 21.68                                   | 24.19                                   | 21.7                  |
| Q <sub>H</sub>                   | 4.56×10 <sup>-4</sup>                                                     | 4.49×10 <sup>-4</sup>                                                     | 3.41×10 <sup>-4</sup>                   | 2.61×10 <sup>-4</sup>                   | 3.14×10 <sup>-4</sup> |
| Q <sub>SC</sub>                  | 6.03×10 <sup>-7</sup>                                                     | 1.53×10 <sup>-7</sup>                                                     | 5.47×10 <sup>-8</sup>                   | 1.76×10 <sup>-7</sup>                   | 8.59×10 <sup>-8</sup> |
